# Supplementary material for: Tumor-Activated Neutrophils Promote Metastasis in Breast Cancer via the G-CSF-RLN2-MMP-9 Axis
Source: Research Square preprint supplement (doi:10.21203/rs.3.rs-1358848/v1), 2022-02-17
Supplement: Supplementary file 1 [file 5c959fe6e0116181642f93ca.docx]

|  | HR | HR.95L | HR.95H | *P* value |
| --- | --- | --- | --- | --- |
| High level of neutrophils | 1.294 | 1.033 | 1.623 | 0.025 |
| Grade 3 | 1.328 | 1.109 | 1.592 | 0.002 |
| HER2 (+) | 1.748 | 1.403 | 2.179 | <0.001 |
| LN(+) | 1.796 | 1.497 | 2.154 | <0.001 |
| PR (+) | 0.824 | 0.690 | 0.984 | 0.032 |

**Table S1 The univariate analysis of metabric cohorts.**
